# Worldwide Effectiveness of Various Non-Pharmaceutical Intervention Control Strategies on the Global COVID-19 Pandemic: A Linearised Control Model

Joshua Choma<sup>1</sup>, Fabio Correa, PhD<sup>5</sup>, Salah-Eddine Dahbi, PhD<sup>1</sup>, Barry Dwolatzky, PhD<sup>4</sup>, Leslie Dwolatzky<sup>3</sup>, Kentaro Hayasi<sup>3</sup>, Benjamin Lieberman<sup>1</sup>, Caroline Maslo, MD, PhD<sup>6</sup>, Bruce Mellado, PhD<sup>1,2</sup>, Kgomotso Monnakgotla<sup>1</sup>, Jacques Naudé<sup>7</sup>, Xifeng Ruan, PhD<sup>1</sup>, Finn Stevenson<sup>1</sup>

---

## Abstract

**Background** COVID-19 is a virus which has led to a global pandemic. Worldwide, more than 130 countries have imposed severe restrictions, which form part of a set of non-pharmaceutical interventions (NPIs). We aimed to quantify the country-specific effects of these NPIs and compare them using the Oxford COVID-19 Government Response Tracker (OxCGRT) stringency index,  $p$ , as a measure of NPI stringency.

**Methods** We developed a dual latent/observable Susceptible Infected Recovered Deaths (SIRD) model and applied it on each of 22 countries and 25 states in the US using publicly available data. The observable model parameters were extracted using kernel functions. The regression of the transmission rate,  $\beta$ , as a function of  $p$  in each locale was modeled through the interven-

---

<sup>1</sup>School of Physics and Institute for Collider Particle Physics, University of the Witwatersrand, Johannesburg, Wits 2050, South Africa

<sup>2</sup>iThemba LABS, National Research Foundation, P.O. Box 722, Somerset West 7129, South Africa

<sup>3</sup>School of Computer Science and Applied Mathematics, University of the Witwatersrand, Johannesburg, Wits 2050, South Africa

<sup>4</sup>Joburg Centre for Software Engineering, University of the Witwatersrand, Johannesburg, Wits 2050, South Africa

<sup>5</sup>Department of Statistics, Rhodes University, Grahamstown 6139, South Africa

<sup>6</sup>Department of Quality Leadership, Netcare Hospitals, Johannesburg, South Africa

<sup>7</sup>working in association with Biomedical Engineering Research Group, School of Electrical and Information Engineering, University of the Witwatersrand, Johannesburg, South Africa

tion leverage,  $\alpha_s$ , an initial transmission rate,  $\beta_0$  and a typical adjustment time,  $b_r^{-1}$ .

**Results** The world average for the intervention leverage,  $\alpha_s = 0.01$  (95% CI 0.0102 - 0.0112) had an ensemble standard deviation of 0.0017 (95% C.I. 0.0014 - 0.0021), strongly indicating a universal behavior.

**Discussion** Our study indicates that removing NPIs too swiftly will result in the resurgence of the spread within one to two months, in alignment with the current WHO recommendations. Moreover, we have quantified and are able to predict the effect of various combinations of NPIs. There is a minimum NPI level, below which leads to resurgence of the outbreak (in the absence of pharmaceutical and clinical advances). For the epidemic to remain sub-critical, the rate with which the intervention leverage  $\alpha_s$  increases should outpace that of the relaxation of NPIs.

*Keywords:* COVID-19, Model, Control

---

## 1. Introduction

1 A novel corona virus, named COVID-19, was detected in the Hubei  
2 province of China in late December 2019 and rapidly spread resulting in  
3 a confirmed global pandemic by 11 March 2020<sup>1</sup>. As at 26 April 2020, the  
4 total number of infections has exceeded 3.1 million confirmed cases with more  
5 than 210 thousand deaths worldwide attributable to the effects of the virus<sup>2</sup>.  
6 A large, worldwide modeling effort is currently underway to improve health  
7 policy decision making with regards to the COVID-19 pandemic<sup>3-7</sup>. Many  
8 research groups and national response teams have looked into country spe-  
9 cific intervention strategies<sup>4,6-9</sup>.

10 Recently, the total level of NPI stringency has been classified by the Oxford  
11 COVID-19 Government Response Tracker (OxCGRT) team and a nominal  
12 index measure has been defined for use by the wider international commu-  
13 nity. We address the use of this index measure to establish the degree and  
14 characteristics of control of the transmission rate of the virus within a rep-  
15 resentative sample of countries in the World and states in the United States  
16 of America.  
17  
18

## 19 **2. Research in Context**

### 20 *2.1. Evidence before this study*

21 Multiple teams have produced epidemic models which allow for the pre-  
22 diction of response to NPIs within their given locale. The typical complexity  
23 and bespoke nature of these models has meant that transferring insights from  
24 one country to another has been challenging. Comparing sufficient statistics  
25 (where they have been defined) amongst multiple other countries has not  
26 been done before.

### 27 *2.2. Added value of this study*

28 By comparing a wide variety of locales; we have shown a universality *of*  
29 *form* in response to changes in NPIs. Our modeling paradigm is succinct  
30 and requires only a few observable parameters to be measured in addition  
31 to what is presently done for successful control. These parameters allow for  
32 predicting not only *how much* effect a given NPI level has, but also *how long*  
33 we need to wait before we observe the effects.

### 34 *2.3. Implications of the available evidence*

35 The insight our research offers is a worldwide survey of the dynamics and  
36 characteristics various countries possess with regards to the control of the  
37 pandemic, through non-pharmaceutical interventions (NPI)s. Policy makers  
38 may now gradually control their local epidemic within their contextual situ-  
39 ation without having to rely on the parameters derived from other country-  
40 specific intervention studies. This quantification allows policy makers to  
41 define safe limits of control.

## 42 **3. Method**

43 For a fair comparison of the effect of interventions, carefully curated,  
44 comprehensive and frequently updated data is a requirement. Data was,  
45 therefore, sourced from the Johns Hopkins COVID-19 data repository be-  
46 cause it fulfilled both the due diligence and frequency of updating needed for  
47 this research.<sup>10</sup>

48 Using this existing data up to and including 26 April 2020, multiple SIRD  
49 with latent dynamics and error propagation models (see Appendix B for full  
50 details) were employed. The chosen modeling method is simpler than others  
51 used in this pandemic.<sup>7</sup> This is a feature since it is 'mind-sized' and has a

52 number of sufficient statistics needed to understand the response to control.  
53 An initial cohort of 23 countries and 25 states within the United States of  
54 America were chosen to be as representative and diverse as possible.  
55 Levels of control were measured by the Oxford COVID-19 Government Re-  
56 sponse Tracker (OxCGRT) stringency index.<sup>11</sup> This index, denoted  $p$  in our  
57 work, takes values from 0 to 100 and is indicative of the severity and num-  
58 ber of discrete measures that have been taken to try to curb the spread of  
59 COVID-19.<sup>11</sup>  
60 At the time of writing; America did not have a stringency index published.  
61 Incorporating their reported NPIs into the OxCGRT framework described  
62 fully in Appendix A.  
63 Daily parameter estimates of the models were extracted from the data using  
64 a least-squares framework and candidate kernel functions were regressed on  
65 the daily parameter estimates. These kernel functions represent the time do-  
66 main response of a model parameter to a given level of control and are based  
67 on a dynamic hypotheses that additive effects of random variables contribute  
68 to the observed effects of intervention.<sup>12</sup>  
69 This sort of exponential behaviour will cease to be representative if there is a  
70 systematic breakdown in roll-out of the interventions (so called 'fat tails').<sup>13</sup>  
71 If such a systematic breakdown were to happen, our proposed kernel func-  
72 tions would cease to be valid.

### 73 *3.1. Model*

74 The characteristics of the present pandemic are atypical in that infected  
75 individuals may be asymptomatic and infectious.<sup>14</sup>  
76 To this end, we developed a dual observable/latent SIRD model to capture  
77 the essential features of the present COVID-19 outbreak and allow for clear  
78 interpretation with regards to control and decision making. This model is  
79 depicted in Figure 1 and has several key parameters which completely char-  
80 acterise the behaviour.  
81 The latent dynamics are essential to capture the following clinical properties  
82 of COVID-19:

- 83 1. Asymptomatic cases are infectious<sup>15,16</sup>.
- 84 2. It is possible for deaths to be overstated since positive tests are not a  
85 requirement in some locales for establishing the basic underlying cause  
86 of death in this pandemic; reasonable clinical judgement is<sup>17</sup>. In addi-  
87 tion, overstatements in clinical cases may be due to the highly infectious

- 88 nature of the virus; patients with severe comorbidities may not neces-  
89 sarily die with the virus as the basic underlying cause even though it  
90 is likely to be present in the patient if they are admitted to a facility  
91 with many active COVID-19 cases.
- 92 3. There are early reports that the latent prevalence (using a seropreva-  
93 lence study) may be as high as 14% of one of the most densely populated  
94 cities in the World<sup>18</sup>.
  - 95 4. There have been serious calls for protection of front-line health care  
96 workers as a result of early experiences with the epidemic<sup>19,20</sup>. The  
97 nosocomial infections within hospital care providers as a group may be  
98 non-negligible, though for the large scale model we are considering, this  
99 group has not been partitioned separately.

100 The observable (directly measurable) dynamics capture the standard features  
101 of susceptible portions of the population becoming infected and then either  
102 recovering with perpetual immunity or dying.

103 There is evidence that relapse is possible, where recovered patients would  
104 become susceptible again<sup>21</sup>. This model variation has not been explicitly  
105 considered because do not know the significance of this yet; it is possible that  
106 these are people who were not fully cured<sup>21</sup>, they may have been reinfected  
107 with a different strain<sup>16</sup>, the reverse transcription polymerase chain reaction  
108 (RT-PCR) test can give a positive result due to extracellular RNA, shedding  
109 of non-viable virions etc.

110 Of note is that the implicit assumption with this approach is that there is  
111 a single viral strain which is being modelled. If there are multiple strains,  
112 each of which is observable and differentiable through specialised testing then  
113 refinements on the labelling and parameters are possible.

114

### 115 *3.2. Observable Dynamics*

116 Under the stated clinical conditions the transmissions between known in-  
117 fected patients,  $I$ , and susceptible individuals (in the broadest sense possible)  
118 should be rare. The typical disease progression time frame<sup>14,22</sup> implies that  
119 latent infections leading to deaths should be rare, it is presumed that patients  
120 with severe symptoms are brought in for treatment. Under these conditions  
121 the latent dynamics in the model simplify with  $\delta_L \approx 0$  and  $\beta \approx 0$  and this  
122 model simplification is used throughout.

123 What is observed then, in terms of increase in measured infections  $I$ , is

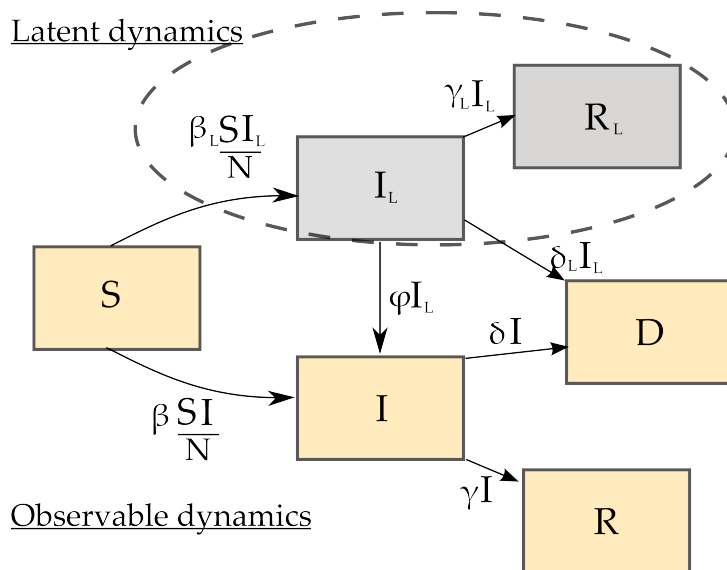

Figure 1: SIRD model with Unobserved Latent Dynamics.

124 achieved strictly through  $\phi I_L$ . These are the detected infections and depen-  
 125 dent on the detection rate,  $\phi$ .

126

### 127 3.3. Daily observed infection rate, $\phi$

128 An important component for estimating  $\phi$  is the number of positive in-  
 129 dividuals who do not know their status and are asymptomatic. Random  
 130 testing has proven useful in this regard in Iceland<sup>16</sup> and New York<sup>18</sup>.  
 131 Reliable estimates of asymptomatic cases due to either extensive randomised  
 132 testing or exhaustive testing in closed populations are presented in Table 1.  
 133 Unfortunately, the number of asymptomatic cases are approximately 50%  
 134 of all positive COVID-19 patients. The fraction of asymptomatic cases in  
 135 enclosed populations, the number of patients with antibodies present (due to  
 136 randomised population seroprevalence studies) and patients with symptoms  
 137 who are sub-clinical and do not warrant admission and formal testing will  
 138 also all influence the rate measured by  $\phi$ .

### 139 3.4. Kernel functions

140 The roll-out of any country-wide control measure is subject to random  
 141 variations in timing and levels of civil compliance dependent on the execu-

| Study                                              | Asympt. positive tests   |
|----------------------------------------------------|--------------------------|
| Diamond Princess <sup>14</sup> [n=4,062]           | 55% (95% CI 52%-59%)     |
| Vo Italy <sup>23</sup> [n=3,300]                   | 50% - 75%                |
| Japanese nationals evacuated <sup>24</sup> [n=565] | 31% (95% CI: 7.7% - 54%) |
| Nursing home, Washington <sup>25</sup> [n=23]      | 43% (95% CI 26% - 63%)   |
| Iceland (Open Invite) <sup>16</sup> [n=10,797]     | 41% (95% CI 32% - 52%)   |
| Iceland (Random) <sup>16</sup> [n=2,283]           | 54% (95% CI 30% - 77%)   |
| Northern Italy blood donors <sup>26</sup> [n=60]   | 66% (95% CI 54% - 77%)   |

Table 1: Results from various studies regarding the number of asymptomatic cases amongst those testing positive for COVID-19.

142 tion plan and the populace’s disposition. This was modeled with the kernel  
 143 function, conditioned on the control measure  $p$ :

$$\beta_p(t) = (1 + b_0 e^{-b_r \Delta t}) \beta_f(p), \quad (1)$$

144 where  $\beta_f(p)$  is the asymptotic value of the observed daily transmission rate,  $b_r$   
 145 is the typical adjustment rate and  $b_0$  is used to model the initial transmission  
 146 rate before the control  $p$  is applied. A characteristic plot is depicted in Figure  
 147 2.

148 As a starting point, it is hypothesised that the typical adjustment rate  $b_r$  is  
 149 characteristic of a nation and that  $\beta_f(p)$  is dependent on the stringency of  
 150 control  $p$  through:

$$\beta_f(p) = \beta_0(1 - \alpha_s p), \quad (2)$$

151 where  $\alpha_s$  is the intervention leverage. In the absence of data on the popu-  
 152 lation dynamics during withdrawal of some NPI’s, our model is conservative  
 153 and uses the same typical adjustment rate for the withdrawal of NPI’s as for  
 154 the addition of NPIs.

155 The kernel function for  $\gamma(t)$  is:

$$\gamma_p(t) = \gamma_0, \quad (3)$$

156 regardless of control. The clinical and physical justification for this model  
 157 is that the inherent properties of the recovery process do not change with  
 158 non-pharmaceutical control, assuming the hospital system has not been over-  
 159 whelmed yet.

160

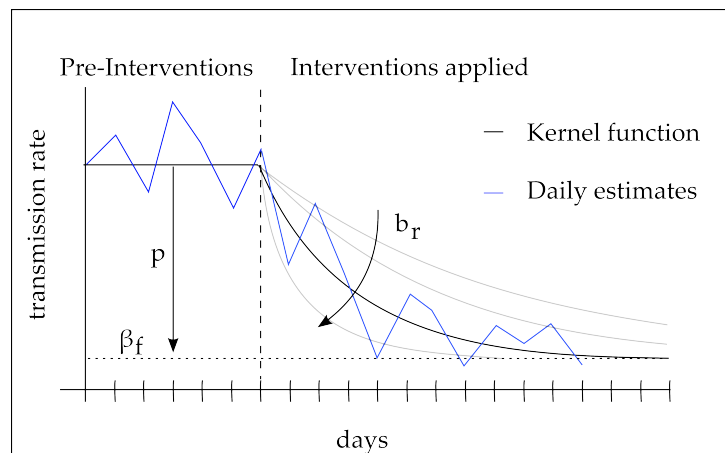

Figure 2: The transmission rate kernel function depicting the typical adjustment rate,  $b_r$  and final transmission rate  $\beta_f$ . The control index  $p$  affects the total reduction in transmission.

161 The kernel function for  $\delta(t)$  is:

$$\delta_p(t) = d_0 t^{d_1} e^{-d_r \Delta t}, \quad (4)$$

162 which is the result that would be theoretically expected from a cascade of  
 163 first order processes<sup>27</sup>. The temporary increase in this parameter is due to  
 164 the reduced number of severe infections which will artificially raise it since  
 165  $\delta \propto I^{-1}$ , see (B.7). This function captures the transients inherent in the  
 166 daily death count as a result of intervention only.

### 167 3.5. Control

168 The capacity of countries to properly address the risk that COVID-19  
 169 poses is varied; with less than half being fully positioned to prevent, detect,  
 170 and respond appropriately<sup>28</sup>. The World Health Organisation identifies the  
 171 need to reduce human-to-human transmission of the virus using numerous  
 172 public health measures.<sup>2</sup>

173 The effect of these various control policies on our latent model are depicted  
 174 in Figure 3. This Figure clearly demonstrates the value of the proposed  
 175 methodology; one may holistically view the epidemic and various policy ac-  
 176 tions in a single framework and be able to anticipate the consequences.

177 A method to measure the overall level of control is described next.



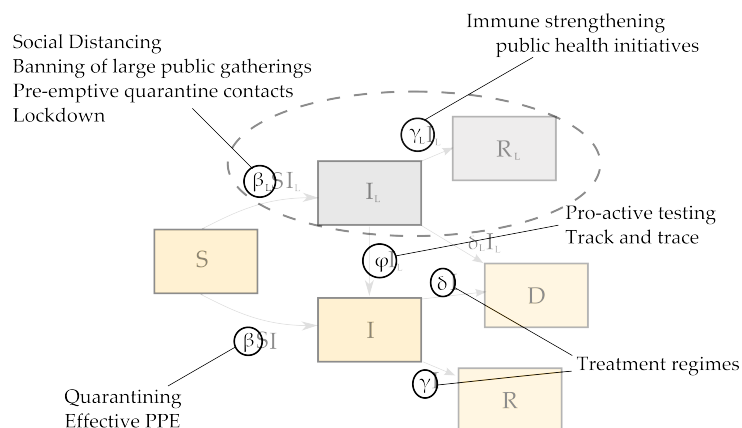

Figure 3: The Effects of Various Interventions on the Model

### 178 3.6. NPIs and the OxCGRT Stringency Index

179 The OxCGRT has developed a valuable database for comparing countries  
 180 response strategies.<sup>29</sup> The database contains the following levels of control  
 181 (coded using ordinal numbers) and timing for 139 countries:

- 182 1. S1 - School closure
- 183 2. S2 - Workplace closure
- 184 3. S3 - Cancel public events
- 185 4. S4 - Close public transport
- 186 5. S5 - Public information campaign
- 187 6. S6 - Domestic travel bans
- 188 7. S7 - International travel bans

189 Also included in this data set is a Stringency Index,  $p$  in our notation,  
 190 which provides a single number that captures the overall level of interven-  
 191 tion implied by combinations of the ordinal numbers S1-S7. The Oxford  
 192 stringency index is calculated using a weighted average of the above seven  
 193 non-pharmaceutical interventions<sup>30</sup>.

194  
 195 As an example of the use of this index, the overall intervention level  
 196 is depicted in Figure 4, plotted against the number of days since the first  
 197 reported COVID-19 case.

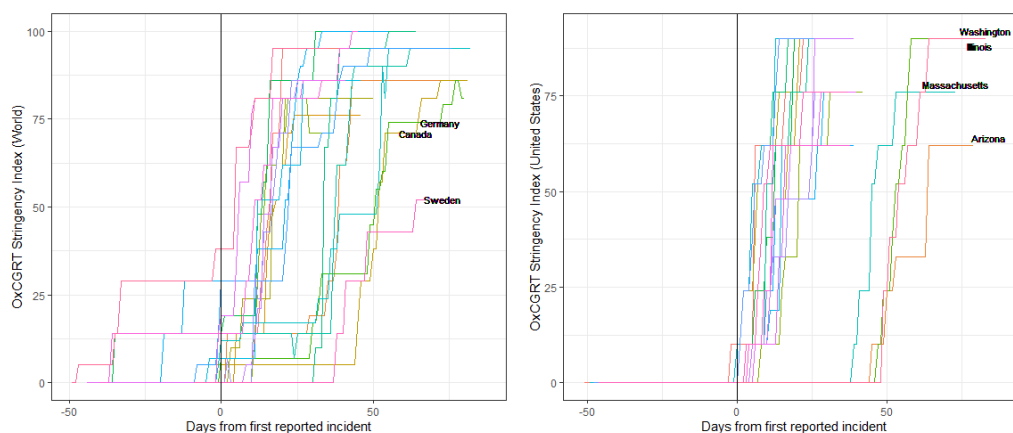

Figure 4: Timing and Severity of NPIs in our set of representative countries and US

#### 198 4. Results

199 The results, using the foregoing methodology are shown in Table 2 for  
 200 the selected countries in this study and in Table 3 for selected States of the  
 201 US. Results are expressed in terms of  $\gamma_0$ ,  $d_0$ ,  $\beta_0$ ,  $b_r^{-1}$ ,  $p_{max}$  and  $\alpha_s$  in Table 2.  
 202 Table 3 does not display  $\gamma_0$ , as the data for the number of recoveries has  
 203 not been reported in the US since late March<sup>10</sup>. The first salient feature of  
 204 Tables 2 and 3 is that the evolution of the pandemic in different countries  
 205 share strong similarities. Some variations are observed in the parameters  $\gamma_0$ ,  
 206  $d_0$ ,  $\beta_0$ , where  $b_r^{-1}$  is subjected to features of the data most likely to specifics  
 207 in the reporting. Of note though is the consistency of  $\alpha_s$ .

##### 208 4.1. Ensemble variation of intervention leverage, $\alpha_s$

209 With a formal treatment, the following ensemble characteristics are ob-  
 210 served with regards to the intervention leverage across all locales: the en-  
 211 semble average intervention leverage is given by  $\alpha_s = 0.01$  (95% CI 0.0102  
 212 - 0.0112) and the ensemble standard deviation is given by 0.0017 (95% C.I.  
 213 0.0014 - 0.0021). These results depend on the respective marginalisation over  
 214 a Gaussian noise process, a flat prior probability for the mean and a Jeffrey's  
 215 prior for the variance.<sup>12</sup> Note that there were two outliers that were removed  
 216 from this calculation, Sweden and North Dakota and they are left for discus-  
 217 sion.

218 Using the values from Tables 2 and 3, the expected control surfaces which

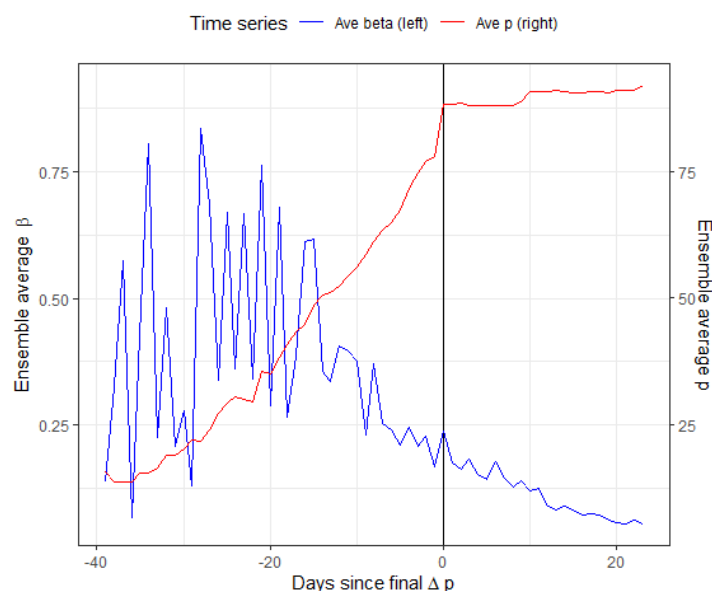

Figure 5: Comparison of ensemble average NPI stringency index,  $p$  against the ensemble average of  $\beta$  as a function of days from the last major change in control value.

219 map stringency level  $p$  to transmission rate  $\beta$  are depicted in Figures 6 and  
220 7 respectively. There are clearly a few outliers which are left for discussion,  
221 but the overall behaviour is remarkable.

222

## 223 5. Discussion

224 One of the most important results from Tables 2 and 3 is that, for the  
225 bulk of countries and US States, the intervention leverage  $\alpha_s \approx 0.01$ . It is  
226 remarkable that this occurs whilst other parameters are measured to have a  
227 great variety, especially  $\beta_0$ . This striking result also speaks to the universal  
228 character of the stringency index used here to quantify NPIs.

229 The next most important result is the universal time domain response of the  
230 transmission rate,  $\beta$  to a change in stringency of control as depicted in Figure  
231 5. The ensemble averages of  $\beta$  and  $p$  produce a very clear exponential decay  
232 to enhanced control which is well modeled by the kernel function proposed  
233 in eq. (1). For visual confirmation, a representative sample of countries are  
234 depicted in Figure 8.

| Country      | $\gamma_0$ | $d_0$   | $\beta_0$ | $b_r^{-1}$ [days] | $p_{max}$ | $\alpha_s$ |
|--------------|------------|---------|-----------|-------------------|-----------|------------|
| Austria      | 0.045      | 0.00342 | 0.26      | 7.15              | 95        | 0.010      |
| Belgium      | 0.019      | 0.00070 | 0.24      | 19.12             | 86        | 0.012      |
| Brazil       | 0.034      | 0.01670 | 0.39      | 2.97              | 76        | 0.009      |
| Canada       | 0.026      | 0.00333 | 0.31      | 13.53             | 86        | 0.010      |
| Chile        | 0.036      | 0.00150 | 0.30      | 5.74              | 81        | 0.009      |
| Ecuador      | 0.006      | 0.00004 | 0.42      | 2.89              | 100       | 0.009      |
| Egypt        | 0.027      | 0.00058 | 0.15      | 9.18              | 100       | 0.005      |
| France       | 0.023      | 0.00012 | 0.41      | 8.32              | 95        | 0.009      |
| Germany      | 0.042      | 0.00258 | 0.28      | 10.50             | 86        | 0.011      |
| Ireland      | 0.015      | 0.00372 | 0.34      | 23.46             | 86        | 0.012      |
| Israel       | 0.018      | 0.00003 | 0.27      | 8.89              | 100       | 0.009      |
| Italy        | 0.020      | 0.00107 | 0.24      | 10.26             | 95        | 0.010      |
| Morocco      | 0.011      | 0.0021  | 0.25      | 16.58             | 86        | 0.010      |
| Netherlands  | 0.001      | 0.00050 | 0.22      | 16.21             | 86        | 0.012      |
| Peru         | 0.051      | 0.00163 | 0.33      | 1.49              | 86        | 0.007      |
| Portugal     | 0.002      | 0.00045 | 0.31      | 8.28              | 100       | 0.009      |
| South Africa | 0.018      | 0.00050 | 0.28      | 2.19              | 100       | 0.008      |
| South Korea  | 0.032      | 0.00031 | 0.07      | 16.24             | 81        | 0.012      |
| Spain        | 0.037      | 0.00006 | 0.34      | 11.96             | 95        | 0.010      |
| Sweden       | 0.003      | 0.00002 | 0.12      | 38.09             | 52        | 0.019      |
| Switzerland  | 0.036      | 0.00045 | 0.46      | 8.12              | 81        | 0.012      |
| Turkey       | 0.012      | 0.00047 | 0.64      | 14.41             | 95        | 0.011      |
| UK           | 0.001      | 0.00027 | 0.23      | 14.37             | 71        | 0.013      |

Table 2: Results for various representative countries around the World. Results are given in terms of  $\gamma_0$ ,  $d_0$ ,  $\beta_0$ ,  $b_r^{-1}$ ,  $p_{max}$  and  $\alpha_s$  (see text). Parameters have been obtained with data up until April 26 2020.

235 *5.1. Predictive capabilities of the model*

236 The recent few weeks of extreme containment measures across the world  
 237 have yielded valuable data to allow for country-specific predictions. With  
 238 respect to transmission rate, our model can answer *how much?* change we  
 239 can expect to see and *by when?* we expect to see it as function of  $p$ ; as seen  
 240 in eq. (5). This was derived using eqs. (1) and (2).

241 Hence,

$$\beta(t, p) = \beta_f - (1 + e^{-b_r t})\beta_0\alpha_s\Delta p, \quad (5)$$

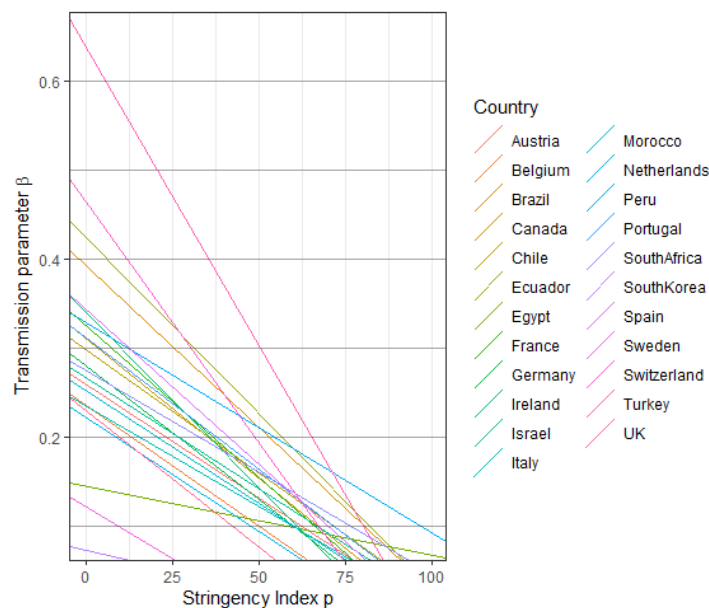

Figure 6: Control surfaces of the model on observed transmission rate and stringency index for ensemble of countries within the study.

242 where  $t = 0$  corresponds to the end of the lockdown period and the enacting  
 243 of new interventions, such that  $p < p_{max}$ . The next few weeks of post-  
 244 lockdown actions by a number of countries and states may refute this model  
 245 and should be watched with interest.

### 246 5.2. Predictions for Italy

247 For illustration purposes, we choose the configuration of parameters ob-  
 248 tained with Italian data, where  $\phi = 0.1$  is used (see Section 3.2). The scenario  
 249 considered here assumes that variations of the index occur after the last avail-  
 250 able data with  $\Delta p = -10, -30$ .

251 Figure 9 depicts the time dependence of the number of symptomatic pop-  
 252 ulation, the active cases and the cumulative number of cases and fatalities.  
 253 One can appreciate that going from  $\Delta p = -10$  to  $\Delta p = -30$  has serious  
 254 consequences in terms of the time it takes to achieve the peak in active case  
 255 as well as the amplitude of the peak.

256 This is further illustrated in Figure 10, where the number of active cases  
 257 and daily fatalities are shown as a function of time for different  $\Delta p$  ranging  
 258 from -10 to -50. The time required for the peak to occur would go from over

| Country        | $d_0$   | $\beta_0$ | $b_r^{-1}$ [days] | $p_{max}$ | $\alpha_s$ |
|----------------|---------|-----------|-------------------|-----------|------------|
| Alabama        | 0.00074 | 0.40      | 9.01              | 90        | 0.011      |
| Arizona        | 0.00009 | 0.34      | 5.88              | 62        | 0.014      |
| California     | 0.00093 | 0.23      | 10.56             | 90        | 0.010      |
| Colorado       | 0.00011 | 0.30      | 1.41              | 90        | 0.011      |
| Connecticut    | 0.00057 | 0.54      | 12.19             | 76        | 0.013      |
| Georgia        | 0.00015 | 0.35      | 15.53             | 76        | 0.013      |
| Illinois       | 0.00036 | 0.39      | 9.20              | 90        | 0.010      |
| Indiana        | 0.00127 | 0.33      | 5.99              | 90        | 0.010      |
| Louisiana      | 0.00044 | 0.63      | 5.59              | 90        | 0.011      |
| Maryland       | 0.00282 | 0.34      | 10.66             | 90        | 0.010      |
| Massachusetts  | 0.00251 | 0.25      | 8.98              | 76        | 0.011      |
| Michigan       | 0.00102 | 0.97      | 8.11              | 90        | 0.011      |
| Missouri       | 0.00003 | 0.58      | 3.45              | 76        | 0.012      |
| Nebraska       | 0.00079 | 0.23      | 3.12              | 62        | 0.013      |
| New Jersey     | 0.00002 | 0.50      | 8.20              | 90        | 0.011      |
| New York       | 0.00006 | 0.45      | 10.71             | 90        | 0.011      |
| North Carolina | 0.00131 | 0.39      | 9.49              | 90        | 0.010      |
| North Dakota   | 0.00022 | 0.44      | 10.04             | 48        | 0.018      |
| Ohio           | 0.00066 | 0.48      | 15.91             | 90        | 0.011      |
| Oklahoma       | 0.00025 | 0.44      | 4.75              | 76        | 0.012      |
| Pennsylvania   | 0.00005 | 0.38      | 6.81              | 90        | 0.010      |
| Texas          | 0.00009 | 0.35      | 8.17              | 76        | 0.012      |
| Utah           | 0.00049 | 0.46      | 4.86              | 62        | 0.015      |
| Virginia       | 0.00135 | 0.34      | 5.38              | 76        | 0.011      |
| Washington     | 0.00035 | 0.19      | 5.50              | 90        | 0.010      |

Table 3: Results for various representative states within the United States of America. Results are given in terms of  $\gamma_0$ ,  $d_0$ ,  $\beta_0$ ,  $b_r^{-1}$ ,  $p_{max}$  and  $\alpha_s$  (see text). Parameters have been obtained with data up until April 26 2020.

259 six months to about four and the amplitude of the peak would double for a  
 260 relaxation of  $\Delta p = -20$  instead of  $\Delta p = -10$ . The uncertainty envelope in  
 261 these predictions is driven primarily by the ensemble variation of  $\alpha_s$ , which  
 262 is of order of 10%. This is considered to be a more realistic estimate of the  
 263 potential deviation from the linear behavior assumed in eq. (2). The other  
 264 source of uncertainty is the daily recovery,  $\gamma$ , which is much smaller. Graphs

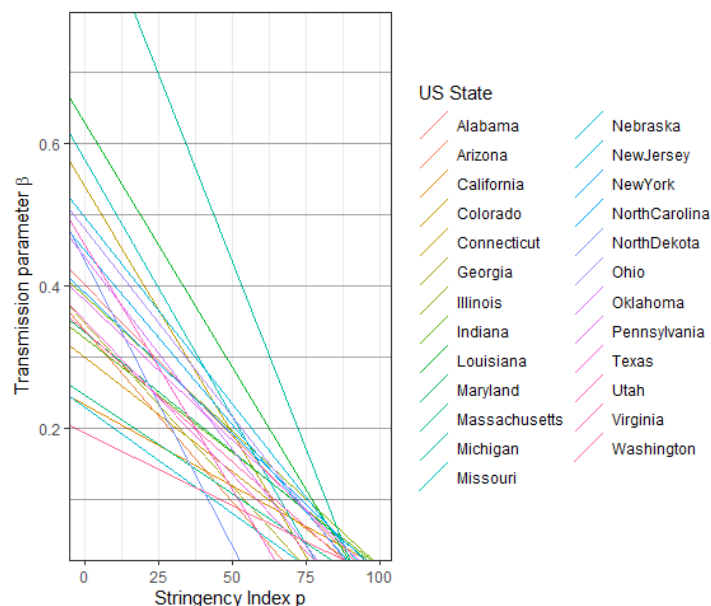

Figure 7: Control surfaces of the model on observed transmission rate and stringency index for ensemble of states within the United States.

265 in Figure 9 display the bands that incorporate these uncertainties.  
266 Figures 9 and 10 predict that releasing containment measures too swiftly  
267 would lead to the resurgence of very large peaks of symptomatic infections  
268 within a month or two, leading to even worse outcomes compared to those  
269 observed so far.

### 270 5.3. Main synthesis: acceptable NPI control levels

271 Our entire synthesis regarding the value of NPIs as a measure of control  
272 of the current pandemic is captured by Figure 11. Once you define the con-  
273 cept of *criticality*, this synthesis follows by deduction.

274  
275 **Definition:** Criticality is the allowable daily transmission rate, given the  
276 current daily recovery rate and daily death rate such that some constraint is  
277 almost, but not quite, violated.

278  
279 For illustration, consider the constraint of keeping peak active cases be-  
280 low a threshold to prevent the country's health care system from being over-  
281 whelmed. There exists a critical line in the control surface of Figure 11, for

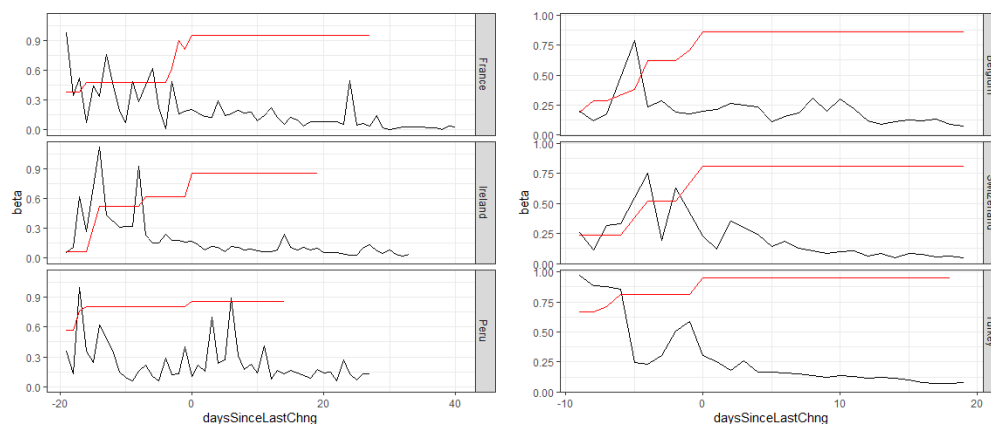

Figure 8: Representative sample of transmission rates in response to NPIs for countries. The exponential kernel in the response (black) to change in NPI (red) is clearly evident in all of these.

282 a given  $\gamma + \delta$ , that achieves this uniquely for that locale.

283 It is a very general principle, that the critical line is raised as the susceptible  
 284 population is reduced in number. The full non-linear model in eq. (C.1)  
 285 demonstrates this, as fewer and fewer people are susceptible the lower the  
 286 need for NPIs to remain sub-critical.

287 If the desire is to relax NPIs below the current critical NPI level,  $p_c$ ;  
 288 the only other degree of freedom left is the intervention leverage  $\alpha_s$  which  
 289 will need to be closely monitored. Outlier locales in Tables 2 and 3 have  
 290 demonstrated that this is possible.

#### 291 5.4. Monitoring intervention leverage is important

292 It is paramount to closely monitor the evolution of intervention leverage  
 293  $\alpha_s$  as NPIs are released. If the clinical situation does not change,  $\gamma$  and  $\delta$   
 294 will remain small. The allowable transmission rates will also have to remain  
 295 small as well and therefore strict measures of NPIs will need to remain in  
 296 place.

297 It is essential to increase  $\alpha_s$  if the desire is to relax NPIs beyond the current  
 298 critical NPI level,  $p_c$  in Figure 11. By increasing  $\alpha_s$ , the critical NPI level  
 299 is 'left shifted' and allows for an even greater relaxation of NPIs than would  
 300 otherwise be possible. For the system to remain sub-critical, the rate with  
 301 which  $\alpha_s$  increases should outpace that of the decrease of the stringency index  
 302 if a total relaxation of NPIs is desired. Monitoring of  $\alpha_s$  becomes essential



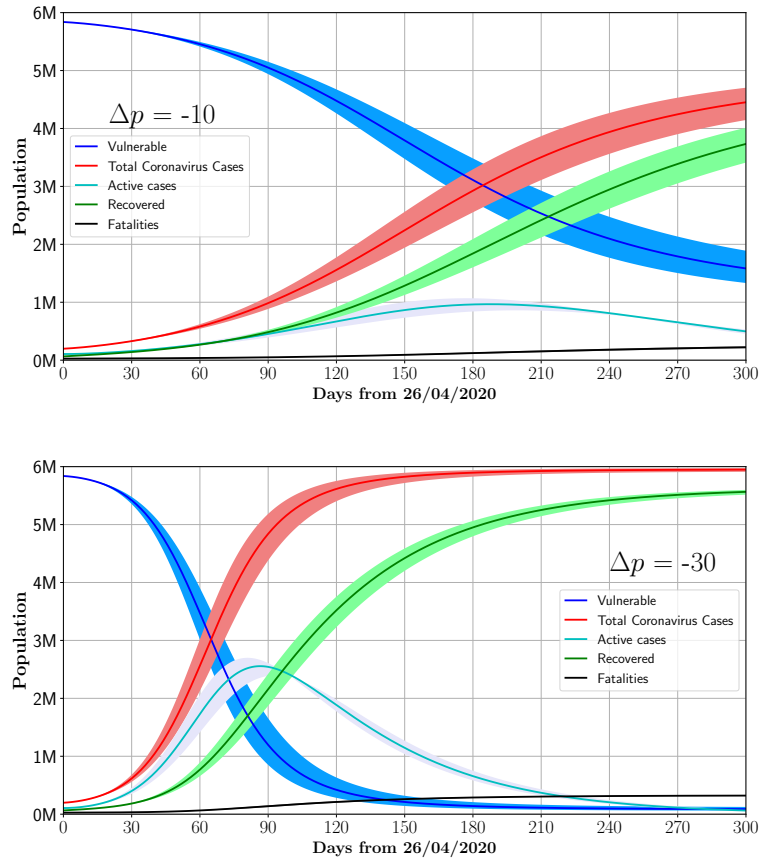

Figure 9: Post-lockdown scenarios for Italy for  $p = 85$  (upper plot),  $p = 65$  (lower plot). Results are given using  $\phi = 0.1$  of the susceptible population population, or vulnerable population, active cases and the cumulative distribution of total cases and fatalities. The bands correspond to the uncertainties in the model (see text).

303 to controlling the post-lockdown phase when controlled in this regime. For  
 304 further details, see Appendix E.

305

### 306 5.5. Easier compliance with softer NPIs

307 One is tempted to speculate about the possibility of non-linear behavior  
 308 in Eq. 2, where data would favor  $\alpha_s$  to increase as  $p$  decreases i.e. it would  
 309 be easier for citizens to comply with less stringent NPIs. This would be good  
 310 news in terms of the effort required to manage the pandemic in that the

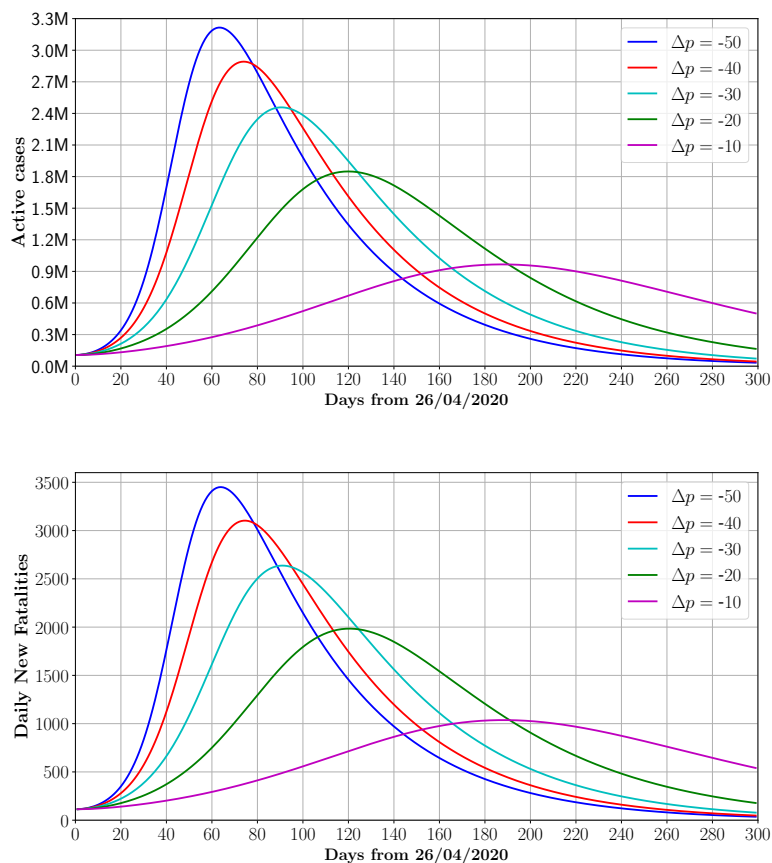

Figure 10: Number of active cases and new fatalities as a function for time for Italy by assuming different values of  $\Delta p$  ranging from -10 to -50. Results are computed with  $\phi = 0.1$ .

311 effectiveness of containment measures could increase as  $p$  decreases. This  
312 argument is hindered by the fact that the lapse of time between changes in  
313 the observed non-pharmaceutical interventions was not significant and mea-  
314 suring the effect of each individual intervention was therefore difficult. As a  
315 result of swift action by Governments, we observe the effect of an ensemble of  
316 more or less stringent measures, as opposed to their sequential application.  
317 To this end, we lack the evidence that would support the above mentioned  
318 non-linear behavior.

319

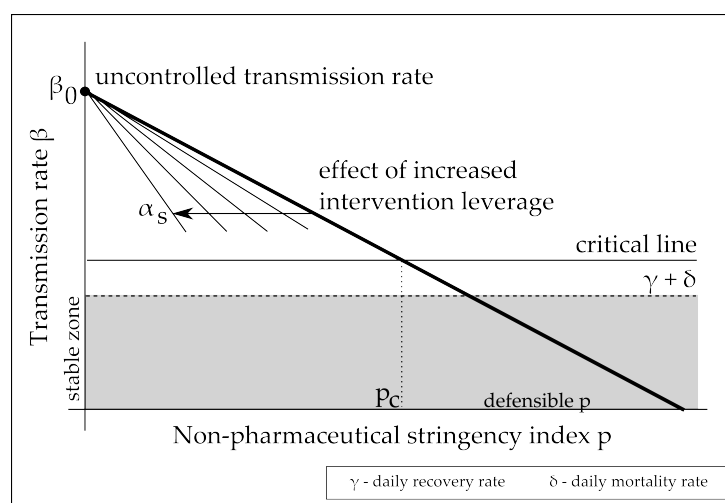

Figure 11: The constraints on the NPI control surface as it relates to the transmission rate. The intervention leverage,  $\alpha_s$  affects how easy it is for a country to reduce transmission rate for a given stringency index level. There is a linearly stable zone, meaning that the observed daily transmission rate is less than the combined daily recovery  $\gamma$  and daily death rate  $\delta$  i.e.  $R_t < 1$ . By definition, the critical level of NPI  $p_c$  may not be reduced further or there will be a guarantee of overwhelming the healthcare system. Note that the critical line moves upward as the size of the susceptible population decreases.

| Locale       | $p_{max}$ | $\alpha_s$ | No. cities pop. greater than 1M |
|--------------|-----------|------------|---------------------------------|
| Arizona      | 62        | 0.014      | 1 (Phoenix, 1.6M)               |
| North Dakota | 48        | 0.018      | 0                               |
| Utah         | 62        | 0.015      | 0                               |
| Sweden       | 52        | 0.019      | 1 (Stockholm, 1.6M)             |
| Switzerland  | 81        | 0.012      | 0                               |

Table 4: Locales with relatively large  $\alpha_s$  values and low  $p_{max}$  relative to other states and counties in the study set.

### 320 5.6. Insights from Outliers

321 It is appropriate to comment on some of the outliers identified in the  
322 estimation of intervention leverage  $\alpha_s$ . Table 4 summarises this discussion;  
323 density of people plays a key role in intervention leverage and a correlation  
324 study with World Bank data substantiates this claim further (See Appendix  
325 D for further details). It need not be ignored that the prolonged spread of the  
326 virus during the early stages of the pandemic in Italy and Spain were driven  
327 by lack homogeneity in the adherence to advisories. This prompted govern-  
328 ments to introduce severe restrictions to movement, where law enforcement  
329 agencies became heavily involved in ensuring compliance. The importance  
330 of public awareness and compliance with regards to NPIs to slow the spread  
331 is hence embodied by the intervention leverage  $\alpha_s$  and is an important ob-  
332 servable during the post-lockdown stage.

### 333 5.7. Recommendations

334 A world wide survey paper is intended to follow our results where the key  
335 parameters of our latent SIRD model are correlated with macro-economic,  
336 public health and geo-physical measurements to determine the environmental  
337 effects on the transmission, recovery and mortality parameters of COVID19.  
338 While lockdown measures have been successful in curbing the spread, our  
339 study indicates that removing them too swiftly will result in the resurgence  
340 of the spread within one to two months. Reducing the stringency index by 10  
341 will delay reaching the apex by about 6 months, where reducing it by 20 will  
342 delay by only four. The peak cases almost double by moving from  $\Delta p = -10$   
343 to  $\Delta p = -20$ . This indicates that post-lockdown measures should be staged  
344 and the reduction of the stringency index should be slow.

### Contributors

JC - Data collection, data analysis FC - Data analysis, review of writing SD  
- Data analysis, simulation, figures BD - Data collection, review of writing  
LD - Data collection, review of writing KH - Data collection, Data analysis  
BL - Data collection, data analysis, figures, tables CM - Literature search,  
writing review BM - Study design, writing, data interpretation, data anal-  
ysis, modeling KM - Data collection, data analysis, figures JN - Literature  
search, figures, writing, data analysis, data interpretation, modeling XR -  
Data analysis FS - Data collection, data analysis, figures, writing

### Declaration of interests

All authors declare no competing interests.

### Acknowledgements

Authors are indebted to the South African Department of Science and In-  
novation and the National Research Foundation for different forms of sup-  
port. This includes, but it is not limited to, support through the SA-CERN  
Program and the National E-science Postgraduate Teaching and Training  
Platform. Authors are also grateful for grant support from the IEEE. The  
funders of this project had no role in study design, data collection, data  
analysis, data interpretation, or writing of the report. BM, JN, BL, FS, SD,  
JC, BD, LD, KH, KM, XR had access to all of the data. The corresponding  
author had final responsibility for the decision to submit for publication.

## Appendix A. Stringency Index for United States of America

For each policy response measure S1-S7, OxCGRT use the ordinal value  
(and add one if the policy is general rather than targeted). This creates a  
score between 0 and 2 and for S5, and 0 and 3 for the other six responses<sup>29</sup>.

The OxCGRT stringency index is given by:

$$p = \frac{1}{7} \sum_{J=1}^7 p_J, \quad (\text{A.1})$$

where  $p_J$  is defined by:

$$p_J = \frac{S_J + G_J}{N_J + 1}, \quad (\text{A.2})$$

with  $G_J = 1$  if the effect is general (and 0 otherwise), and  $N_J$  is the cardinal-  
ity of the intervention measure<sup>29,30</sup>. In the case where there is no requirement

375 of general vs. targeted ( $S_7$ ), the +1 in the denominator and the  $G_J$  in the  
376 numerator are omitted from the equation to form:

$$p_7 = \frac{S_7}{N_7}, \quad (\text{A.3})$$

377 The OxCGRT database contains data for 133 countries however it does  
378 not contain specific data for US states. It is important to be able to compare  
379 the US states non-pharmaceutical interventions (NPIs) with those of other  
380 countries around the World in a unified framework.

381  
382 To this end, we coded the known levels of intervention in America to  
383 match as nearly as possible, the OxCGRT system. We used the Institute  
384 for Health Metrics and Evaluation (IHME) dashboard to obtain six dates at  
385 which specific states imposed different NPIs<sup>31</sup>.

386

| <b>Label</b> | <b>NPI</b>                    |
|--------------|-------------------------------|
| $U1$ :       | Stay at Home Order            |
| $U2$ :       | Educational Facilities Closed |
| $U3$ :       | Non-essential Services Closed |
| $U4$ :       | Travel Severely Limited       |
| $U5$ :       | Initial Workplace Closure     |
| $U6$ :       | Banned Mass Gatherings        |

Table A.5: Table Showing US Interventions Acquired from the IHME.

387 In order to compare the US intervention data it was necessary to make  
388 a stringency index for the US states that mimics that of the index that was  
389 made for the World data by OxCGRT.

390

391 The following decisions were made during the process of mapping the re-  
392 ported US NPIs to the OxCGRT index:

- 393 • The US *Mass Gatherings Banned*  $U5$  can be mapped directly to the  
394 *Oxford Cancel Public Events*  $S3$ .
- 395 • The US *Initial Business Closure*  $U6$  can be mapped to the Oxford  
396 *Work Place Closure*  $S2$

- 397 • The US *Travel Severely Limited*  $U_4$  can be mapped to the Oxford *Do-*  
 398 *mestic Travel Bans*  $S_6$  and *International Travel Bans*  $S_7$  combined.

| Label        | Interventions Not Directly Interchangeable |
|--------------|--------------------------------------------|
| US NPIs:     |                                            |
| $U_1$ :      | Stay at Home Order                         |
| $U_3$ :      | Non-essential Services Closed              |
| OxCGRT NPIs: |                                            |
| $S_4$ :      | Close Public Transport                     |
| $S_5$ :      | Public Information Campaign                |

Table A.6: Table Showing Unmapped NPIs.

399 Although some of the above US interventions were not directly compa-  
 400 rable to the OxCGRT indicators, their individual impact on the stringency  
 401 index is still valid and should be included in the index. By including  $U_1$  and  
 402  $U_3$  with the appropriate weight into the same calculation OxCGRT used for  
 403 their index, an equivalent US index is created. The following equation was  
 404 developed:

$$p = \frac{1}{7}(1(v_1) + 1(v_2) + 1(v_3) + 2(v_4) + 1(v_5) + 1(v_6)), \quad (\text{A.4})$$

405 where  $v_i$  is a number out of 100 indicating the extent each of the inter-  
 406 ventions are imposed.

407  
 408 Due to lack of data on the *Travel Severely Limited* intervention in the  
 409 IHME database. It was necessary to source US travel restrictions information  
 410 from other US news sources. There have been a number of travel interven-  
 411 tions that have been implemented however there have not been widespread  
 412 travel bans between states.<sup>32</sup> The first significant travel restriction was a  
 413 US-Europe travel ban to 26 European countries, which was announced on  
 414 11 March 2020.<sup>33</sup> On 19 March 2020 the US issued a level 4 "Do not travel"  
 415 advisory which is the highest travel restriction in the US. US citizens were  
 416 informed that they can travel back to the US if they were out of the country  
 417 when the ban was announced but if they do not do so timely they might find  
 418 themselves having to stay abroad for an extended period of time. Foreign  
 419 nationals who have been to the 26 EU countries or the UK, China, Iran or  
 420 Ireland are not allowed entrance to the US.<sup>34</sup> In terms of the interstate travel

421 restrictions. There have been no full travel bans but in some states you are  
422 required to quarantine for 14 days after arrival.<sup>32</sup> Therefore, it was necessary  
423 to introduce a leveled implementation of the U4 *Travel Severely Restricted*  
424 measure. Using the same logic used by the Oxford COVID-19 Government  
425 Response Tracker (OxCGRT) the following equation for  $v_i$  was introduced:

$$v_i = 100 \frac{U_i}{N_i}, \quad (\text{A.5})$$

426 where  $U_i$  is ordinal and can vary from 0 to the cardinality of the inter-  
427 vention measure,  $N_i$ . This is for the purpose of incorporating levels of imple-  
428 mentation of specific interventions into the stringency calculation. Based on  
429 the data the only intervention that requires levels of implementation is the  
430  $U_4$  intervention.

431 The following ordinal levels were employed for  $U_4$ :

- 433 0. No travel restrictions (US before the 11 March 2020)
- 434
- 435 1. US preliminary travel ban to 26 EU Countries (Commenced 11 March  
436 2020)
- 437
- 438 2. Level 4 “Do not travel” advisory issued (19 March 2020)
- 439
- 440 3. Interstate Travel bans (No interstate travel bans are currently imposed)

441 The specification for comparable  $p$  among countries within the OxCGRT  
442 database and the United States of America is completed with the above  
443 definitions.

## 444 **Appendix B. Model Details**

445 An explanation of the model is warranted. It has a causal structure and  
446 may be clinically interpreted as well, both of which are desirable properties  
447 for a model which needs to be controlled. The causal structure gives insight  
448 into *what* to control and the clinical interpretation gives insights into *how*.

449

450 **Susceptible individuals, S** : These are the unexposed and suscepti-  
451 ble individuals within the population and include healthcare workers as well



452 general members of the public.

453

454 **Observed infections,  $I$**  : These infections represent patients who have  
455 tested positive for COVID-19 and are actively reported on<sup>10</sup>. Any contacts of  
456 these patients who subsequently test positive, any nosocomial infections due  
457 to these patients (for example, healthcare workers who contract the disease)  
458 or any other individuals who knowingly interact with COVID-19 positive  
459 patients are modeled by  $\beta$ , the transmission rate of COVID-19 amongst ob-  
460 served infections. Well prepared countries with strict healthcare protocols for  
461 known positive patients, for example quarantining, effective use of personal  
462 protective equipment for healthcare providers, and physically separate care  
463 pathways for positive patients all essentially work to ensure that  $\beta$  is kept as  
464 small as possible.

465 Asymptomatic also transmissible Some of these observed infections,  $I$  are  
466 due to some mild or asymptomatic cases which become severe enough to  
467 warrant testing or cause patients to seek medical attention. These cases are  
468 modeled by  $\phi I_L$ , where  $\phi$  is dependent on the probability that a latent in-  
469 fection  $I_L$  becomes a known positive case,  $I$ . Latent infections are addressed  
470 next.

471

472 **Latent infections,  $I_L$**  : There is evidence of a non-trivial fraction of  
473 cases going undetected as a result of presenting with mild symptoms or be-  
474 ing asymptomatic<sup>35,36</sup>. This is the reason for including the latent variable  
475 dynamics within our modification of the standard SIRD model.

476 Table 1 in the main text has good estimates of asymptomatic cases; together  
477 with the patients who have subclinical manifestations of Covid-19, these cases  
478 are all included in the latent infection group,  $I_L$ .

479 It is the susceptible group's interaction with these asymptomatic and mild  
480 cases which produce new latent infections and this is modeled through  $\beta_L$ ,  
481 the non-negligible latent transmission rate.

482

483 **Latent recoveries,  $R_L$**  : A majority of these asymptomatic and mild  
484 symptom patients resolve the virus using their natural immunity without ever  
485 being tested. Early reports indicate that this may be a substantial number of  
486 latent infections<sup>16,18</sup>. These cases eventually form part of the latent recovered  
487 group,  $R_L$ . The rate of recovery of the latent infected group is captured by  $\gamma_L$ .

488

489 **Latent infections dying,  $\delta_L I_L$**  : These counts are considered weakly ob-

490 servable and rare. The weak observability is present with the revised, erratic  
491 death counts by some officials when home visits uncover additional cases<sup>10</sup>.  
492 It is unclear that these may be directly attributable to the virus in that con-  
493 firmation would be required via post-mortem COVID-19 testing<sup>7</sup>. Given  
494 the existing testing burden posed on most countries, this sort of testing is  
495 rare and, therefore, the uncertainty in this parameter will remain high<sup>18</sup>.

496

497 **Known recoveries,  $R$**  : These are patients who are known to test posi-  
498 tive for COVID-19 and are known to have recovered fully from the virus.  
499 The recovery rate,  $\gamma$ , models how quickly known infections are resolved and  
500 discharged out of the healthcare system. This rate is physically dependent  
501 on treatment regime and the patient's own physical condition.

502

503 **Deceased patients,  $D$**  : The number of deceased individuals is denoted  
504 by  $D$ ; and it is mostly affected by the known individuals who have tested  
505 positive and are currently being treated in the prevailing healthcare system.  
506 The implications for the model are that  $\delta \gg \delta_L$  i.e. under normal treatment  
507 and monitoring situations, the implied probability of fatality for a known  
508 infection is much larger than the implied probability of fatality for a latent  
509 infection.

510 Under the above conditions, the model explicitly caters explicitly for the  
511 situation that the latent infections are asymptomatic or mild.

512 It is trivial to show that  $S + I + I_L + R_L + R + D = N$  at every instant  
513 in time. Furthermore, the model in Figure 1 implies that:

$$\frac{dS}{dt} = -\beta_L \frac{S I_L}{N}, \quad (\text{B.1})$$

$$\frac{dI_L}{dt} = \beta_L \frac{S I_L}{N} - \phi I_L - \gamma_L I_L, \quad (\text{B.2})$$

$$\frac{dI}{dt} = \phi I_L - \delta I - \gamma I, \quad (\text{B.3})$$

$$\frac{dR}{dt} = \gamma I, \quad (\text{B.4})$$

$$\frac{dD}{dt} = \delta I. \quad (\text{B.5})$$

514 *Appendix B.1. Linearisation*

515 Each of the equations in (B.1) - (B.5) were linearised using the approx-  
516 imation that  $S = N - \epsilon$ , which gives equivalent results to the Jacobian  
517 method<sup>27</sup>. This operating point corresponds to the case where the epidemic  
518 is still in the early/controllable phase and the number of infected individuals  
519 is small compared with the size of the total population  $N$ .

520 The derivatives with respect to time were approximated using first order  
521 backward difference approximations at a daily level. Classical frequentist er-  
522 ror propagation was applied to this linear approximation using the Gaussian  
523 process assumption.

524 Theoretically, these approximations are valid provided that:

- 525 1. the number of infected are a small fraction of the susceptible popula-  
526 tion.
- 527
- 528 2. the dynamics of the disease process are slow compared with a single  
529 day. This is justified by the work from Weiss and Murdoch<sup>36</sup>.
- 530

531 The final form, used for analysis of the time variation of the parameters  
532 as various forms of control are applied is:

$$\gamma(t) = \frac{\Delta R}{I[t-1]} \pm \sigma_\gamma(t), \quad (\text{B.6})$$

$$\delta(t) = \frac{\Delta D}{I[t-1]} \pm \sigma_\delta(t), \quad (\text{B.7})$$

$$\beta(t) = \frac{\Delta R + \Delta D + \Delta I}{I[t-1]} \pm \sigma_\beta(t), \quad (\text{B.8})$$

533 where  $\sigma_x(t)$  is the noise estimate at day  $t$ ,  $\Delta x := x[t] - x[t-1]$  and  $x$  is  
534 either  $R$ ,  $D$  or  $I$ .

535 *Appendix B.2. Error propagation*

536 Using the coefficient of variation and propagating the error in the linear  
537 approximation, assuming that the errors in the daily counts are within 10%<sup>37</sup>,  
538 the probable noise levels in the daily time variations are calculated by:

$$\sigma_\gamma(t) = \gamma(t) \sqrt{\frac{1}{\Delta R} + \frac{1}{I[t-1]}}, \quad (\text{B.9})$$

$$\sigma_{\beta}(t) = \beta(t) \sqrt{\frac{1}{\Delta R + \Delta I + \Delta D} + \frac{1}{I[t-1]}}, \quad (\text{B.10})$$

539 and

$$\sigma_{\delta}(t) = \delta(t) \sqrt{\frac{1}{\Delta D} + \frac{1}{I[t-1]}}. \quad (\text{B.11})$$

540 These results depend on the count data being Poisson processes and the fact  
 541 that the coefficient of variation of a Poisson process is  $\lambda^{-1/2}$ . Recall that the  
 542 general coefficient of variation of a division of two random variables is the  
 543 quadrature sum of the numerator and denominator coefficients of variation;  
 544 the results follow<sup>37</sup>.

545 *Appendix B.3. Details of Linearisation*

546 If  $dt$  is taken as one day,  $t$  is the day index and  $\Delta x = x[t] - x[t-1]$ , then  
 547 with the modeling assumptions the differential equations simplify to:

$$\Delta S = -\beta_L I_L[t-1], \quad (\text{B.12})$$

$$\Delta I_L = (\beta_L - \gamma_L - \phi) I_L[t-1], \quad (\text{B.13})$$

$$\Delta I = \phi I_L[t-1] - \gamma I[t-1] - \delta I[t-1], \quad (\text{B.14})$$

$$\Delta R = \gamma I[t-1], \quad (\text{B.15})$$

$$\Delta D = \delta I[t-1]. \quad (\text{B.16})$$

548 Use of (B.15) and (B.16) yield the daily estimates of the observable recovery  
 549 rate,  $\gamma$  and fatality rate  $\delta$ . Combining (B.15), (B.16) and (B.14) give the  
 550 daily estimate of the transmission rate, as observed through the detection  
 551 efficiency.

## 552 Appendix C. Control Dynamics

553 Efforts to control the pandemic do not happen everywhere, all at once and  
554 this is the reason that the control efforts can be said to be dynamic. Indeed,  
555 the form of the kernel functions in equations (1) - (4) state this implicitly.  
556 Each of the observed parameters will be looked at it in this section and their  
557 dynamics described. These forms have non-trivial implications for control of  
558 the pandemic and will be expounded upon in a follow up paper.

### 559 Transmission rate

560 The beta kernel in (1) and the steady state behaviour modeled by (2) imply  
561 that the transmission dynamics, under stringency of control  $p$ , behave as a  
562 first order control system<sup>27</sup>:

$$b_r \frac{d\beta}{dt} = \beta_0 - \beta(t) - \beta_0 \alpha_s p, \quad (\text{C.1})$$

563 where  $b_r$  is the typical adjustment time for a control measure to take full  
564 effect,  $\alpha_s$  is the societal sensitivity (estimated for each country in our work)  
565 to control measures  $p \in [0, 100]$ , and  $\beta_0$  is the uncontrolled transmission rate  
566 within a society.

567 As a sense check; when  $p = 0$  then the equilibrium condition of (C.1) is found  
568 by solving (C.1) with  $\beta(t) = \beta_f = \text{const}$ . The non-trivial solution is  $\beta_f = \beta_0$   
569 and shows that, without control, the transmission rate becomes  $\beta_0$ . This is  
570 defined as the uncontrolled transmission rate and is as it should be.

571 If  $p \neq 0$ , then the equilibrium condition is  $\beta_f = \beta_0 - \beta_0 \alpha_s p$  which is exactly  
572 equation (2). The general analytic solution to (C.1) is precisely the kernel  
573 function in (1).

574

575 It is this form which allows for the use of classic and modern control  
576 methods to shape  $\beta(t)$  to a form that is acceptable for the desired goals of  
577 the pandemic control system eg. minimise total deaths, minimise the peak  
578 load on the health care system, maximise the economic activity etc. These  
579 aspects will be dealt with in detail in a follow up paper.

## 580 Appendix D. Correlation of transmission rate with macroscopic 581 indexes

582 The phases of the spread and its parameters bear strong similarities in a  
583 wide range of countries considered here. However, non-trivial differences in

584 terms of parameters can be observed when scrutinising country by country  
585 variations. It is relevant to correlate variances with respect to macroscopic  
586 indexes. For this purpose the number positive cases is analysed as a function  
587 of time using the parametric expression:

$$I(t) = \frac{I_{tot}}{1 + e^{-\xi_I(t-C)}}, \quad (\text{D.1})$$

588 where  $I_{tot}$  denotes the total expected number of positive cases for  $t \rightarrow \infty$ ,  
589  $\xi_I$  is the slope of the exponential growth that characterises the first phase  
590 of the spread, and  $C$  can be interpreted as a measure of the time needed to  
591 deviate from the initial exponential growth leading to containment. Time is  
592 expressed in number of days. A total number of 67 countries are selected,  
593 where containment measures have proven effective in curbing the spread.  
594 These include countries in all continents and with a wide span in terms of  
595 socio-economic development, inequality and population density.

596 Macroscopic indicators are organised according to relevant themes: socio-  
597 economic vulnerabilities, demographics, social expenditures and aggregate  
598 economic indicators. A total of 34 indicators from the World Bank data base  
599 are selected and are correlated with the parameter  $\xi_I$  from each country.

600 The Gini index quantifies the extent to which the distribution of income  
601 among individuals or households deviates from perfect equality. The selected  
602 sample of countries displays a minimum and a maximum Gini index of 24 and  
603 50, respectively. It is found that the parameter  $\xi_I$  is almost insensitive to the  
604 Gini index. This is illustrated in Figure D.12 where the red line corresponds  
605 to a first order polynomial that is consistent with zero slope. In order to  
606 exclude statistical fluctuations in the sample a similar study is performed  
607 using the percentage share of income held by the lowest 10% and 20% of the  
608 income bracket. No significant correlation is found for either of the indexes.  
609 This indicates that social inequality is not strongly correlated with the rate  
610 of spread of the virus.

611 This observation is further strengthened by evaluating the correlation  
612 with the proportion of the urban population living in slum households. Ac-  
613 cording to the World Bank, a slum household is defined as a group of in-  
614 dividuals living under the same roof lacking one or more of the following  
615 conditions: access to improved water, access to improved sanitation, suffi-  
616 cient living area, and durability of housing. Out of the 67 countries under  
617 scrutiny, 18 report a significant fraction of urban population living in slums.  
618 In this sample of countries the fraction ranges from 8% to 53%. No signifi-

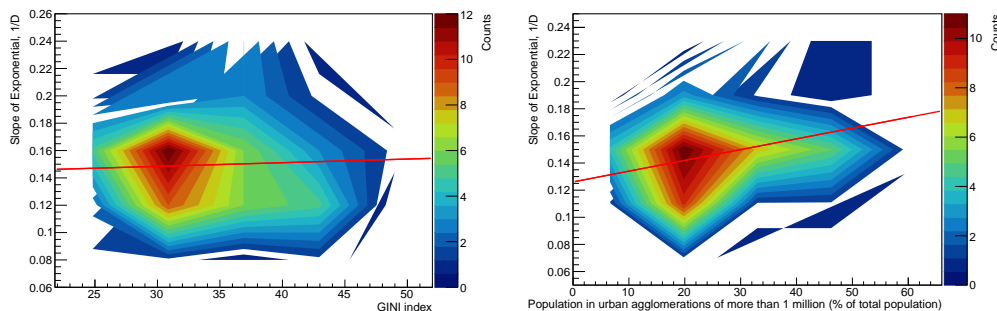

Figure D.12: Correlation of  $\xi_I$  (see text) with the Gini index (left) and the population in urban agglomerations of more than one million to the country's population living in metropolitan areas (right). The red lines correspond to first order polynomials that illustrate the degree of correlation.

619 cant correlation is found between this index and  $\xi_I$ . In addition, the average  
 620 value of  $\xi_I$  for these 18 countries is compatible with that of the rest of the  
 621 ensemble studied.

622 As per the physical picture underlying the model used to describe the  
 623 spread, it is expected that population density should play a significant role.  
 624 No significant correlation is found with the average population density. This  
 625 can be explained by the fact that the average population density is not neces-  
 626 sarily a good metric for population density in urban areas, where the spread  
 627 is most likely to occur. It should be noted that the correlation with the frac-  
 628 tion of the population in urban areas is not statistically significant. In order  
 629 to scrutinise the relevance of localised population density, the index made  
 630 of the population in urban agglomerations of more than one million to the  
 631 country's population living in metropolitan areas in percentiles is used, as il-  
 632 lustrated in Figure D.12. It is found that the correlation can be parametrised  
 633 with a first order polynomial with a slope of  $(1 \pm 0.3) \cdot 10^{-3}$  per day. The  
 634 significance of the correlation greater than a  $3\sigma$  Confidence Level. This the  
 635 most significant correlation out of all the indexes considered here.

## 636 Appendix E. Inequality for relaxing beyond the critical NPI level

637 It will be argued that one of the strategies for the post-lockdown period  
 638 is to increase intervention leverage  $\alpha_s$  as  $p$  decreases. This will sustain quasi-  
 639 linear behavior in the number of active cases and it is depicted in Figures 9

640 and 10 for  $\Delta p = -10$ .

641 In practice, all relevant parameters that enter the temporal evolution de-  
642 scribed above need to be tuned such that the expected peak of the number of  
643 cases and ICU usage falls below the thresholds characteristic to each coun-  
644 try. One can denote a vector of critical parameters for which a country's  
645 healthcare system is not overwhelmed:

$$\vec{v}_c(t) = (\gamma_c, d_c, \beta_c, \alpha_s^c). \quad (\text{E.1})$$

646 This is what is meant by *criticality*; the value of parameters such that the  
647 healthcare system is only marginally not overwhelmed. One can assume that  
648  $\gamma_c$  and  $\delta_c$  display a weak time dependence in that they primarily depend on  
649 medical advances, rather than on NPIs. In this setup the condition for the  
650 system to remain sub-critical can be expressed as follows:

$$\left. \frac{\partial \alpha_s}{\partial t} \right|_c \geq - \left. \frac{\partial p}{\partial t} \right|_c, \quad (\text{E.2})$$

651 where the temporal partial derivatives are evaluated at the point of criticality  
652 defined by  $\vec{v}_c(t)$ . The inequality (E.2), while seemingly straightforward from  
653 a mathematical standpoint, has serious consequences for policy makers.

654 While lockdown measures have been successful in bringing the reproductive  
655 factor down to one and below, it is evident that these are having devastating  
656 effects on the economic landscape. In African countries, lockdown measures  
657 necessary to control the epidemic are leading to widespread malnutrition in  
658 vast sections of the population.

659 On the other hand, the illustrative example shown in Section 5.1, indicates  
660 that for fixed intervention leverage  $\alpha_s$ , reducing  $p$  significantly can lead to  
661 the advent of an epidemic of unprecedented proportions. Under these con-  
662 ditions, the inequality (E.2) speaks to the need to ensure that the rate with  
663 which intervention leverage  $\alpha_s$  grows should outpace that of easing non-  
664 pharmaceutical interventions.

## 665 References

- 666 [1] W.H.O, Who director-general's opening remarks at the  
667 media briefing on covid-19 - 11 march 2020, online  
668 [https://www.who.int/dg/speeches/detail/who-director-general-s-](https://www.who.int/dg/speeches/detail/who-director-general-s-opening-remarks-at-the-media-briefing-on-covid-19—11-march-2020)  
669 [opening-remarks-at-the-media-briefing-on-covid-19—11-march-2020](https://www.who.int/dg/speeches/detail/who-director-general-s-opening-remarks-at-the-media-briefing-on-covid-19—11-march-2020),  
670 accessed 25 Apr, 2020.



- 671 [2] W.H.O, Coronavirus disease 2019 (covid-19) situation report 89 -  
672 18 april 2020, online [https://www.who.int/emergencies/diseases/novel-](https://www.who.int/emergencies/diseases/novel-coronavirus-2019/situation-reports)  
673 [coronavirus-2019/situation-reports](https://www.who.int/emergencies/diseases/novel-coronavirus-2019/situation-reports), accessed 19 Apr, 2020.
- 674 [3] S. Flaxman, S. Mishra, A. Gandy, H. Unwin, H. Coupland, T. Mellan,  
675 H. Zhu, T. Berah, J. Eaton, P. Perez Guzman, N. Schmit, L. Cilloni,  
676 K. Ainslie, M. Baguelin, I. Blake, A. Boonyasiri, O. Boyd, L. Cattarino,  
677 C. Ciavarella, L. Cooper, Z. Cucunuba Perez, G. Cuomo-Dannenburg,  
678 A. Dighe, A. Djaafara, I. Dorigatti, S. Van Elsland, R. Fitzjohn, H. Fu,  
679 K. Gaythorpe, L. Geidelberg, N. Grassly, W. Green, T. Hallett, A. Ham-  
680 let, W. Hinsley, B. Jeffrey, D. Jorgensen, E. Knock, D. Laydon, G. Ned-  
681 jati Gilani, P. Nouvellet, K. Parag, I. Siveroni, H. Thompson, R. Verity,  
682 E. Volz, C. Walters, H. Wang, Y. Wang, O. Watson, P. Winskill, X. Xi,  
683 C. Whittaker, P. Walker, A. Ghani, C. Donnelly, S. Riley, L. Okell,  
684 M. Vollmer, N. Ferguson, S. Bhatt, Report 13: Estimating the num-  
685 ber of infections and the impact of non-pharmaceutical interventions on  
686 covid-19 in 11 european countries (2020).
- 687 [4] K. Leung, J. T. Wu, D. Liu, G. M. Leung, First-wave covid-19 transmis-  
688 sibility and severity in china outside hubei after control measures, and  
689 second-wave scenario planning: a modelling impact assessment, *The*  
690 *Lancet* (2020).
- 691 [5] R. M. Anderson, H. Heesterbeek, D. Klinkenberg, T. D. Hollingsworth,  
692 How will country-based mitigation measures influence the course of the  
693 covid-19 epidemic?, *The Lancet* 395 (2020) 931–934.
- 694 [6] J. Hellewell, S. Abbott, A. Gimma, N. I. Bosse, C. I. Jarvis, T. W.  
695 Russell, J. D. Munday, A. J. Kucharski, W. J. Edmunds, S. Funk, R. M.  
696 Eggo, F. Sun, S. Flasche, B. J. Quilty, N. Davies, Y. Liu, S. Clifford,  
697 P. Klepac, M. Jit, C. Diamond, H. Gibbs, K. van Zandvoort, Feasibility  
698 of controlling covid-19 outbreaks by isolation of cases and contacts, *The*  
699 *Lancet Global Health* 8 (2020) e488–e496.
- 700 [7] N. Ferguson, D. Laydon, G. Nedjati Gilani, N. Imai, K. Ainslie,  
701 M. Baguelin, S. Bhatia, A. Boonyasiri, Z. Cucunuba Perez, G. Cuomo-  
702 Dannenburg, A. Dighe, I. Dorigatti, H. Fu, K. Gaythorpe, W. Green,  
703 A. Hamlet, W. Hinsley, L. Okell, S. Van Elsland, H. Thompson, R. Ver-  
704 ity, E. Volz, H. Wang, Y. Wang, P. Walker, P. Winskill, C. Whit-

- 705 taker, C. Donnelly, S. Riley, A. Ghani, Report 9: Impact of non-  
706 pharmaceutical interventions (npis) to reduce covid19 mortality and  
707 healthcare demand (2020).
- 708 [8] K. Prem, Y. Liu, T. W. Russell, A. J. Kucharski, R. M. Eggo, N. Davies,  
709 M. Jit, P. Klepac, S. Flasche, S. Clifford, C. A. B. Pearson, J. D. Munday,  
710 S. Abbott, H. Gibbs, A. Rosello, B. J. Quilty, T. Jombart, F. Sun,  
711 C. Diamond, A. Gimma, K. van Zandvoort, S. Funk, C. I. Jarvis, W. J.  
712 Edmunds, N. I. Bosse, J. Hellewell, The effect of control strategies to  
713 reduce social mixing on outcomes of the covid-19 epidemic in wuhan,  
714 china: a modelling study, *The Lancet Public Health* (2020).
- 715 [9] B. J. Cowling, S. T. Ali, T. W. Y. Ng, T. K. Tsang, J. C. M. Li, M. W.  
716 Fong, Q. Liao, M. Y. Kwan, S. L. Lee, S. S. Chiu, J. T. Wu, P. Wu, G. M.  
717 Leung, Impact assessment of non-pharmaceutical interventions against  
718 coronavirus disease 2019 and influenza in hong kong: an observational  
719 study, *The Lancet Public Health* (2020).
- 720 [10] E. Dong, H. Du, L. Gardner, An interactive web-based dashboard to  
721 track covid-19 in real time, *The Lancet Infectious Diseases* (2020).
- 722 [11] T. Hale, A. Petherick, T. Phillips, S. Webster, Variation in government  
723 responses to covid-19, bsg-wp-2020/031 4.0, 2020.
- 724 [12] E. T. Jaynes, *Probability theory : the logic of science*, Cambridge Uni-  
725 versity Press, Cambridge, UK New York, NY, 2003.
- 726 [13] N. Taleb, *The Black Swan : The Impact of the Highly Improbable*,  
727 Random House, New York, 2007.
- 728 [14] R. Verity, L. C. Okell, I. Dorigatti, P. Winskill, C. Whittaker, N. Imai,  
729 G. Cuomo-Dannenburg, H. Thompson, P. G. T. Walker, H. Fu, A. Dighe,  
730 J. T. Griffin, M. Baguelin, S. Bhatia, A. Boonyasiri, A. Cori, Z. Cu-  
731 cunubá, R. FitzJohn, K. Gaythorpe, W. Green, A. Hamlet, W. Hinsley,  
732 D. Laydon, G. Nedjati-Gilani, S. Riley, S. van Elsland, E. Volz, H. Wang,  
733 Y. Wang, X. Xi, C. A. Donnelly, A. C. Ghani, N. M. Ferguson, Estimates  
734 of the severity of coronavirus disease 2019: a model-based analysis, *The  
735 Lancet Infectious Diseases* (2020).

- 736 [15] S. Law, A. W. Leung, C. Xu, Severe acute respiratory syndrome (SARS)  
737 and coronavirus disease-2019 (COVID-19): From causes to preventions  
738 in hong kong, *International Journal of Infectious Diseases* (2020).
- 739 [16] D. F. Gudbjartsson, A. Helgason, H. Jonsson, O. T. Magnusson, P. Mel-  
740 sted, G. L. Norddahl, J. Saemundsdottir, A. Sigurdsson, P. Sulem,  
741 A. B. Agustsdottir, B. Eiriksdottir, R. Fridriksdottir, E. E. Gardars-  
742 dottir, G. Georgsson, O. S. Gretarsdottir, K. R. Gudmundsson, T. R.  
743 Gunnarsdottir, A. Gylfason, H. Holm, B. O. Jenson, A. Jonasdottir,  
744 F. Jonsson, K. S. Josefsdottir, T. Kristjansson, D. N. Magnusdottir,  
745 L. le Roux, G. Sigmundsdottir, G. Sveinbjornsson, K. E. Sveinsdot-  
746 tir, M. Sveinsdottir, E. A. Thorarensen, B. Thorbjornsson, A. Löve,  
747 G. Masson, I. Jonsdottir, A. D. Möller, T. Gudnason, K. G. Kristins-  
748 son, U. Thorsteinsdottir, K. Stefansson, Spread of SARS-CoV-2 in the  
749 icelandic population, *New England Journal of Medicine* (2020).
- 750 [17] Cdc guidance for certifying covid-19 deaths, online  
751 [https://www.cdc.gov/nchs/data/nvss/coronavirus/Alert-1-Guidance-](https://www.cdc.gov/nchs/data/nvss/coronavirus/Alert-1-Guidance-for-Certifying-COVID-19-Deaths.pdf)  
752 [for-Certifying-COVID-19-Deaths.pdf](https://www.cdc.gov/nchs/data/nvss/coronavirus/Alert-1-Guidance-for-Certifying-COVID-19-Deaths.pdf), accessed 27 April, 2020.
- 753 [18] New york releases antibody testing data: 14% of  
754 population may be infected with coronavirus, online  
755 [https://eu.usatoday.com/story/news/nation/2020/04/23/coronavirus-](https://eu.usatoday.com/story/news/nation/2020/04/23/coronavirus-new-york-millions-residents-may-have-been-infected-antibody-test/3012920001/)  
756 [new-york-millions-residents-may-have-been-infected-antibody-](https://eu.usatoday.com/story/news/nation/2020/04/23/coronavirus-new-york-millions-residents-may-have-been-infected-antibody-test/3012920001/)  
757 [test/3012920001/](https://eu.usatoday.com/story/news/nation/2020/04/23/coronavirus-new-york-millions-residents-may-have-been-infected-antibody-test/3012920001/), accessed 27 April, 2020.
- 758 [19] T. Lancet, COVID-19: protecting health-care workers, *The Lancet* 395  
759 (2020) 922.
- 760 [20] S.-Y. Wong, R.-S. Kwong, T. Wu, J. Chan, M. Chu, S. Lee, H. Wong,  
761 D. Lung, Risk of nosocomial transmission of coronavirus disease 2019:  
762 an experience in a general ward setting in hong kong, *Journal of Hospital*  
763 *Infection* (2020).
- 764 [21] Y. Shi, Y. Wang, C. Shao, J. Huang, J. Gan, X. Huang, E. Bucci, M. Pi-  
765 acentini, G. Ippolito, G. Melino, COVID-19 infection: the perspectives  
766 on immune responses, *Cell Death & Differentiation* 27 (2020) 1451–1454.
- 767 [22] Y. Liu, L.-M. Yan, L. Wan, T.-X. Xiang, A. Le, J.-M. Liu, M. Peiris,  
768 L. L. M. Poon, W. Zhang, Viral dynamics in mild and severe cases of  
769 COVID-19, *The Lancet Infectious Diseases* (2020).

- 770 [23] M. Day, Covid-19: identifying and isolating asymptomatic people helped  
771 eliminate virus in italian village, *BMJ* (2020) m1165.
- 772 [24] H. Nishiura, T. Kobayashi, A. Suzuki, S.-M. Jung, K. Hayashi, R. Ki-  
773 noshita, Y. Yang, B. Yuan, A. R. Akhmetzhanov, N. M. Linton,  
774 T. Miyama, Estimation of the asymptomatic ratio of novel coronavirus  
775 infections (COVID-19), *International Journal of Infectious Diseases*  
776 (2020).
- 777 [25] A. Kimball, K. M. Hatfield, M. Arons, A. James, J. Taylor, K. Spicer,  
778 A. C. Bardossy, L. P. Oakley, S. Tanwar, Z. Chisty, J. M. Bell, M. Meth-  
779 ner, J. Harney, J. R. Jacobs, C. M. Carlson, H. P. McLaughlin, N. Stone,  
780 S. Clark, C. Brostrom-Smith, L. C. Page, M. Kay, J. Lewis, D. Russell,  
781 B. Hiatt, J. Gant, J. S. Duchin, T. A. Clark, M. A. Honein, S. C.  
782 Reddy, J. A. Jernigan, A. Baer, L. M. Barnard, E. Benoliel, M. S. Fa-  
783 galde, J. Ferro, H. G. Smith, E. Gonzales, N. Hatley, G. Hatt, M. Hope,  
784 M. Huntington-Frazier, V. Kawakami, J. L. Lenahan, M. D. Lukoff,  
785 E. B. Maier, S. McKeirnan, P. Montgomery, J. L. Morgan, L. A. Mum-  
786 mert, S. Pogosjans, F. X. Riedo, L. Schwarcz, D. Smith, S. Stearns, K. J.  
787 Sykes, H. Whitney, H. Ali, M. Banks, A. Balajee, E. J. Chow, B. Cooper,  
788 D. W. Currie, J. Dyal, J. Healy, M. Hughes, T. M. McMichael, L. Nolen,  
789 C. Olson, A. K. Rao, K. Schmit, N. G. Schwartz, F. Tobolowsky, R. Za-  
790 cks, S. Zane, , , and, Asymptomatic and presymptomatic SARS-CoV-2  
791 infections in residents of a long-term care skilled nursing facility — king  
792 county, washington, march 2020, *MMWR. Morbidity and Mortality*  
793 *Weekly Report* 69 (2020) 377–381.
- 794 [26] Coronavirus, castiglione d’adda è un caso di studio: ‘il 70% dei donatori  
795 di sangue è positivo’, online <https://www.lastampa.it/topnews/primopiano/2020/04/02/news/coronavirus-castiglione-d-adda-e-un-caso-di-studio-il-70-dei-donatori-di-sangue-e-positivo-1.38666481>, accessed 27  
796  
797 April, 2020.
- 799 [27] K. Astrom, M. Murray, *Feedback systems : an introduction for scientists*  
800 *and engineers*, Princeton University Press, Princeton, 2008.
- 801 [28] N. Kandel, S. Chungong, A. Omaar, J. Xing, Health security capacities  
802 in the context of covid-19 outbreak: an analysis of international health  
803 regulations annual report data from 182 countries, *The Lancet* 395  
804 (2020) 1047–1053.

- 805 [29] Oxford coronavirus government response tracker, online  
806 [https://www.bsg.ox.ac.uk/research/research-projects/coronavirus-](https://www.bsg.ox.ac.uk/research/research-projects/coronavirus-government-response-tracker)  
807 [government-response-tracker](https://www.bsg.ox.ac.uk/research/research-projects/coronavirus-government-response-tracker), accessed 14 April, 2020.
- 808 [30] University of oxford, calculation and presen-  
809 tation of the stringency index 2.0, online  
810 [https://www.bsg.ox.ac.uk/sites/default/files/Calculation%20and](https://www.bsg.ox.ac.uk/sites/default/files/Calculation%20and%20presentation%20of%20the%20Stringency%20Index.pdf)  
811 [%20presentation%20of%20the%20Stringency%20Index.pdf](https://www.bsg.ox.ac.uk/sites/default/files/Calculation%20and%20presentation%20of%20the%20Stringency%20Index.pdf), accessed 14  
812 April, 2020.
- 813 [31] University of washington, institute for health metrics and evaluation  
814 covid-19 projections, 2020.
- 815 [32] K. Schwartz, Driving and travel restrictions across the united states,  
816 2020.
- 817 [33] P. Baker, U.s. to suspend most travel from europe as world scrambles  
818 to fight pandemic, 2020.
- 819 [34] A. Salcedo, S. Yar, G. Cherelus, Coronavirus travel restrictions, across  
820 the globe, 2020.
- 821 [35] A. Haines, E. F. de Barros, A. Berlin, D. L. Heymann, M. J. Harris,  
822 National UK programme of community health workers for covid-19 re-  
823 sponse, *The Lancet* 395 (2020) 1173–1175.
- 824 [36] P. Weiss, D. R. Murdoch, Clinical course and mortality risk of severe  
825 covid-19, *The Lancet* 395 (2020) 1014–1015.
- 826 [37] D. T. Holmes, K. A. Buhr, Error propagation in calculated ratios,  
827 *Clinical Biochemistry* 40 (2007) 728–734.
